# Supplementary material for: Modulation of microRNome by Human Cytomegalovirus and Human Herpesvirus 6 Infection in Human Dermal Fibroblasts: Possible Significance in the Induction of Fibrosis in Systemic Sclerosis
Source: MDPI journal article supplement (doi:10.3390/cells10051060), 2021-04-29
Supplement: s1 [file s1]

**Table S2. Enrichment analysis based on differentially expressed miRNAs at intermediate time post HCMV infection (7 d.p.i.)**

| Pathways                                                                        | <i>p</i> val | adj <i>p</i> val |
|---------------------------------------------------------------------------------|--------------|------------------|
| Homologous Recombination Repair                                                 | 0            | 0                |
| Double-Strand Break Repair                                                      | 0            | 0                |
| DNA Repair                                                                      | 0            | 0                |
| Homologous recombination repair of replication-independent double-strand breaks | 0            | 0                |
| Recruitment of repair and signaling proteins to double-strand breaks            | 0            | 0                |
| Gene Expression                                                                 | 4.42E-17     | 7.37E-16         |
| Metabolism                                                                      | 1.36E-11     | 1.94E-10         |
| Disease                                                                         | 2.88E-10     | 3.6E-09          |
| Cell Cycle                                                                      | 1.57E-09     | 1.74E-08         |
| Infectious disease                                                              | 3.55E-09     | 3.55E-08         |
| Cell Cycle, Mitotic                                                             | 6.66E-09     | 6.05E-08         |
| Metabolism of proteins                                                          | 1.37E-08     | 1.14E-07         |
| HIV Infection                                                                   | 7.95E-08     | 6.12E-07         |
| Organelle biogenesis and maintenance                                            | 4.46E-07     | 3.07E-06         |
| Developmental Biology                                                           | 4.6E-07      | 3.07E-06         |
| HIV Life Cycle                                                                  | 1.15E-06     | 6.94E-06         |
| Platelet activation, signaling and aggregation                                  | 1.18E-06     | 6.94E-06         |
| Adaptive Immune System                                                          | 2.36E-06     | 1.31E-05         |
| Immune System                                                                   | 2.89E-06     | 1.52E-05         |
| Late Phase of HIV Life Cycle                                                    | 3.19E-06     | 1.6E-05          |
| Diseases of signal transduction                                                 | 4.82E-06     | 2.3E-05          |
| Membrane Trafficking                                                            | 6.95E-06     | 3.16E-05         |
| Vesicle-mediated transport                                                      | 1.29E-05     | 5.61E-05         |
| Post-translational protein modification                                         | 1.36E-05     | 5.67E-05         |
| Signalling by NGF                                                               | 1.64E-05     | 6.56E-05         |
| Programmed Cell Death                                                           | 2.83E-05     | 0.000109         |
| Apoptosis                                                                       | 3.69E-05     | 0.000137         |
| Signaling by the B Cell Receptor (BCR)                                          | 4.06E-05     | 0.000145         |
| NGF signalling via TRKA from the plasma membrane                                | 4.41E-05     | 0.000152         |
| Signaling by EGFR                                                               | 5.06E-05     | 0.000169         |
| Cell Cycle Checkpoints                                                          | 0.000061     | 0.000197         |
| Downstream signaling events of B Cell Receptor (BCR)                            | 7.09E-05     | 0.000222         |
| Assembly of the primary cilium                                                  | 7.71E-05     | 0.000228         |
| M Phase                                                                         | 7.76E-05     | 0.000228         |
| S Phase                                                                         | 0.000107     | 0.000306         |
| Transcription                                                                   | 0.000117     | 0.000325         |
| Mitochondrial translation                                                       | 0.000122     | 0.000329         |
| Signaling by Wnt                                                                | 0.000125     | 0.000329         |
| Cellular responses to stress                                                    | 0.000178     | 0.000433         |
| Generic Transcription Pathway                                                   | 0.000186     | 0.000433         |

|                                                                     |          |          |
|---------------------------------------------------------------------|----------|----------|
| Mitotic G2-G2/M phases                                              | 0.000187 | 0.000433 |
| Signaling by ERBB2                                                  | 0.000193 | 0.000433 |
| Downstream signal transduction                                      | 0.00021  | 0.000433 |
| Signaling by FGFR                                                   | 0.00021  | 0.000433 |
| Mitochondrial translation initiation                                | 0.000223 | 0.000433 |
| Mitochondrial translation elongation                                | 0.000223 | 0.000433 |
| Mitochondrial translation termination                               | 0.000223 | 0.000433 |
| G2/M Transition                                                     | 0.000225 | 0.000433 |
| Metabolism of lipids and lipoproteins                               | 0.000253 | 0.000477 |
| Translation                                                         | 0.000317 | 0.000582 |
| Hemostasis                                                          | 0.000321 | 0.000582 |
| Host Interactions of HIV factors                                    | 0.000332 | 0.000582 |
| Mitotic G1-G1/S phases                                              | 0.000332 | 0.000582 |
| Axon guidance                                                       | 0.000346 | 0.000597 |
| SUMOylation                                                         | 0.000368 | 0.000624 |
| Mitotic Metaphase and Anaphase                                      | 0.000382 | 0.000637 |
| MyD88-independent TLR3/TLR4 cascade                                 | 0.000408 | 0.000656 |
| Toll Like Receptor 3 (TLR3) Cascade                                 | 0.000408 | 0.000656 |
| Mitotic Anaphase                                                    | 0.000413 | 0.000656 |
| TRIF-mediated TLR3/TLR4 signaling                                   | 0.000451 | 0.000705 |
| Signaling by PDGF                                                   | 0.00046  | 0.000708 |
| Signaling by VEGF                                                   | 0.000515 | 0.000769 |
| DNA Replication                                                     | 0.000515 | 0.000769 |
| Downstream signaling of activated FGFR                              | 0.000561 | 0.00079  |
| SUMOylation of DNA damage response and repair proteins              | 0.00061  | 0.000836 |
| SUMO E3 ligases SUMOylate target proteins                           | 0.00061  | 0.000836 |
| DAP12 signaling                                                     | 0.00071  | 0.000957 |
| Asparagine N-linked glycosylation                                   | 0.000718 | 0.000957 |
| Toll Like Receptor 4 (TLR4) Cascade                                 | 0.000743 | 0.000968 |
| Signaling by TGF-beta Receptor Complex                              | 0.000745 | 0.000968 |
| Separation of Sister Chromatids                                     | 0.000766 | 0.000982 |
| Synthesis of DNA                                                    | 0.000814 | 0.00103  |
| Fc epsilon receptor (FCERI) signaling                               | 0.000832 | 0.00104  |
| Activated TLR4 signalling                                           | 0.000977 | 0.001206 |
| Beta-catenin independent WNT signaling                              | 0.00101  | 0.001232 |
| VEGFA-VEGFR2 Pathway                                                | 0.00107  | 0.001289 |
| Toll-Like Receptors Cascades                                        | 0.00119  | 0.001417 |
| Signaling by Hedgehog                                               | 0.0013   | 0.001529 |
| Transcription of the HIV genome                                     | 0.00136  | 0.001581 |
| Anchoring of the basal body to the plasma membrane                  | 0.0014   | 0.001609 |
| RNA Polymerase II Transcription                                     | 0.00154  | 0.00175  |
| RNA Polymerase II Pre-transcription Events                          | 0.00167  | 0.001867 |
| Regulation of mRNA stability by proteins that bind AU-rich elements | 0.00168  | 0.001867 |

|                                                          |         |          |
|----------------------------------------------------------|---------|----------|
| Response to elevated platelet cytosolic Ca <sup>2+</sup> | 0.00184 | 0.002022 |
| TCF dependent signaling in response to WNT               | 0.00199 | 0.002161 |
| C-type lectin receptors (CLRs)                           | 0.00201 | 0.002161 |
| Metabolism of amino acids and derivatives                | 0.00208 | 0.002213 |
| Metabolism of carbohydrates                              | 0.00217 | 0.00226  |
| Influenza Infection                                      | 0.00217 | 0.00226  |
| Cyclin E associated events during G1/S transition        | 0.00225 | 0.00232  |
| G1/S Transition                                          | 0.00233 | 0.002378 |
| Autodegradation of Cdh1 by Cdh1:APC/C                    | 0.00249 | 0.002515 |
| Processing of Capped Intron-Containing Pre-mRNA          | 0.00275 | 0.00275  |
