# Supplementary material for: Modulation of microRNome by Human Cytomegalovirus and Human Herpesvirus 6 Infection in Human Dermal Fibroblasts: Possible Significance in the Induction of Fibrosis in Systemic Sclerosis
Source: MDPI journal article supplement (doi:10.3390/cells10051060), 2021-04-29
Supplement: s1 [file s1]

**Table S4. Enrichment analysis based on differentially expressed miRNAs at early times post HHV-6 infection (0 and 4 d.p.i.)**

| <b>Pathways</b>                                         | <b><i>p</i> val</b> | <b>adj <i>p</i> val</b> |
|---------------------------------------------------------|---------------------|-------------------------|
| Gene Expression                                         | 4.93E-31            | 4.93E-29                |
| Cell Cycle, Mitotic                                     | 1.31E-15            | 6.55E-14                |
| Infectious disease                                      | 1.05E-14            | 3.5E-13                 |
| Cell Cycle                                              | 9.7E-14             | 2.43E-12                |
| Metabolism of proteins                                  | 5.4E-13             | 1.08E-11                |
| Disease                                                 | 1.36E-11            | 2.27E-10                |
| HIV Life Cycle                                          | 1.95E-11            | 2.79E-10                |
| HIV Infection                                           | 2.34E-11            | 2.93E-10                |
| Vesicle-mediated transport                              | 3.31E-11            | 3.68E-10                |
| Membrane Trafficking                                    | 4.49E-11            | 4.49E-10                |
| Late Phase of HIV Life Cycle                            | 1.47E-10            | 1.34E-09                |
| DNA Repair                                              | 1.1E-08             | 9.17E-08                |
| Transcription                                           | 2.24E-08            | 1.72E-07                |
| Cell Cycle Checkpoints                                  | 3.82E-08            | 2.61E-07                |
| Mitotic G2-G2/M phases                                  | 3.92E-08            | 2.61E-07                |
| G2/M Transition                                         | 5.74E-08            | 3.54E-07                |
| Mitotic Metaphase and Anaphase                          | 6.02E-08            | 3.54E-07                |
| Metabolism                                              | 6.66E-08            | 3.56E-07                |
| Generic Transcription Pathway                           | 6.99E-08            | 3.56E-07                |
| Mitotic Anaphase                                        | 7.11E-08            | 3.56E-07                |
| S Phase                                                 | 1.15E-07            | 5.48E-07                |
| M Phase                                                 | 1.57E-07            | 7.14E-07                |
| Translation                                             | 1.72E-07            | 7.48E-07                |
| Beta-catenin independent WNT signaling                  | 2.39E-07            | 9.96E-07                |
| Separation of Sister Chromatids                         | 2.66E-07            | 1.06E-06                |
| DNA Replication                                         | 3.16E-07            | 1.22E-06                |
| Influenza Infection                                     | 3.29E-07            | 1.22E-06                |
| Organelle biogenesis and maintenance                    | 4.29E-07            | 1.53E-06                |
| Processing of Capped Intron-Containing Pre-mRNA         | 5.58E-07            | 1.92E-06                |
| Developmental Biology                                   | 7.35E-07            | 2.45E-06                |
| Influenza Life Cycle                                    | 7.92E-07            | 2.53E-06                |
| Synthesis of DNA                                        | 8.08E-07            | 2.53E-06                |
| Mitotic G1-G1/S phases                                  | 9.55E-07            | 2.89E-06                |
| mRNA Splicing - Major Pathway                           | 1.12E-06            | 3.2E-06                 |
| mRNA Splicing                                           | 1.12E-06            | 3.2E-06                 |
| Signalling by NGF                                       | 1.52E-06            | 4.18E-06                |
| C-type lectin receptors (CLRs)                          | 1.59E-06            | 4.18E-06                |
| Influenza Viral RNA Transcription and Replication       | 1.59E-06            | 4.18E-06                |
| Post-translational protein modification                 | 1.76E-06            | 4.51E-06                |
| GTP hydrolysis and joining of the 60S ribosomal subunit | 3.17E-06            | 7.8E-06                 |
| NGF signalling via TRKA from the plasma membrane        | 3.2E-06             | 7.8E-06                 |

|                                                                           |          |          |
|---------------------------------------------------------------------------|----------|----------|
| Regulation of mRNA stability by proteins that bind AU-rich elements       | 3.59E-06 | 8.36E-06 |
| L13a-mediated translational silencing of Ceruloplasmin expression         | 3.76E-06 | 8.36E-06 |
| 3' -UTR-mediated translational regulation                                 | 3.76E-06 | 8.36E-06 |
| RNA Polymerase II Transcription                                           | 3.76E-06 | 8.36E-06 |
| Programmed Cell Death                                                     | 3.9E-06  | 8.48E-06 |
| Eukaryotic Translation Initiation                                         | 5.1E-06  | 1.06E-05 |
| Cap-dependent Translation Initiation                                      | 5.1E-06  | 1.06E-05 |
| Signaling by EGFR                                                         | 6.05E-06 | 1.22E-05 |
| Apoptosis                                                                 | 6.12E-06 | 1.22E-05 |
| Signaling by TGF-beta Receptor Complex                                    | 6.42E-06 | 1.26E-05 |
| G1/S Transition                                                           | 8.84E-06 | 0.000017 |
| Immune System                                                             | 9.63E-06 | 1.79E-05 |
| Platelet activation, signaling and aggregation                            | 9.69E-06 | 1.79E-05 |
| TRAF6 Mediated Induction of proinflammatory cytokines                     | 0.00001  | 1.82E-05 |
| VEGFA-VEGFR2 Pathway                                                      | 1.03E-05 | 1.84E-05 |
| Regulation of PLK1 Activity at G2/M Transition                            | 1.09E-05 | 1.91E-05 |
| Cellular responses to stress                                              | 1.19E-05 | 2.05E-05 |
| APC/C-mediated degradation of cell cycle proteins                         | 0.000013 | 2.17E-05 |
| Regulation of mitotic cell cycle                                          | 0.000013 | 2.17E-05 |
| Nonsense-Mediated Decay (NMD)                                             | 1.37E-05 | 2.21E-05 |
| Nonsense Mediated Decay (NMD) enhanced by the Exon Junction Complex (EJC) | 1.37E-05 | 2.21E-05 |
| Signaling by VEGF                                                         | 1.47E-05 | 2.33E-05 |
| SUMOylation                                                               | 1.57E-05 | 2.38E-05 |
| M/G1 Transition                                                           | 1.57E-05 | 2.38E-05 |
| DNA Replication Pre-Initiation                                            | 1.57E-05 | 2.38E-05 |
| SRP-dependent cotranslational protein targeting to membrane               | 1.61E-05 | 2.38E-05 |
| Signaling by PDGF                                                         | 1.67E-05 | 2.38E-05 |
| Toll Like Receptor 10 (TLR10) Cascade                                     | 1.69E-05 | 2.38E-05 |
| Toll Like Receptor 5 (TLR5) Cascade                                       | 1.69E-05 | 2.38E-05 |
| MyD88 cascade initiated on plasma membrane                                | 1.69E-05 | 2.38E-05 |
| CLEC7A (Dectin-1) signaling                                               | 1.74E-05 | 2.42E-05 |
| MyD88-independent TLR3/TLR4 cascade                                       | 1.88E-05 | 2.54E-05 |
| Toll Like Receptor 3 (TLR3) Cascade                                       | 1.88E-05 | 2.54E-05 |
| Transcription of the HIV genome                                           | 2.05E-05 | 2.71E-05 |
| Formation of a pool of free 40S subunits                                  | 2.06E-05 | 2.71E-05 |
| Signaling by Interleukins                                                 | 2.23E-05 | 2.86E-05 |
| PCP/CE pathway                                                            | 2.26E-05 | 2.86E-05 |
| TRIF-mediated TLR3/TLR4 signaling                                         | 2.26E-05 | 2.86E-05 |
| Diseases of signal transduction                                           | 0.000025 | 3.13E-05 |
| G2/M Checkpoints                                                          | 2.81E-05 | 3.43E-05 |
| Nucleotide Excision Repair                                                | 2.81E-05 | 3.43E-05 |
| RNA Polymerase II Pre-transcription Events                                | 3.01E-05 | 3.63E-05 |
| Regulation of APC/C activators between G1/S and early anaphase            | 3.25E-05 | 3.87E-05 |

|                                                                              |          |          |
|------------------------------------------------------------------------------|----------|----------|
| Downstream signaling events of B Cell Receptor (BCR)                         | 3.29E-05 | 3.87E-05 |
| SUMOylation of DNA damage response and repair proteins                       | 3.89E-05 | 4.47E-05 |
| SUMO E3 ligases SUMOylate target proteins                                    | 3.89E-05 | 4.47E-05 |
| Deadenylation-dependent mRNA decay                                           | 4.24E-05 | 4.76E-05 |
| MAP kinase activation in TLR cascade                                         | 4.24E-05 | 4.76E-05 |
| Nonsense Mediated Decay (NMD) independent of the Exon Junction Complex (EJC) | 4.74E-05 | 5.27E-05 |
| Cyclin E associated events during G1/S transition                            | 5.34E-05 | 5.87E-05 |
| Signaling by the B Cell Receptor (BCR)                                       | 6.31E-05 | 0.000065 |
| Cytokine Signaling in Immune system                                          | 6.38E-05 | 0.000065 |
| Autodegradation of Cdh1 by Cdh1:APC/C                                        | 6.47E-05 | 0.000065 |
| Downstream signal transduction                                               | 0.000065 | 0.000065 |
| Signaling by FGFR                                                            | 0.000065 | 0.000065 |
