# Supplementary material for: Modulation of microRNome by Human Cytomegalovirus and Human Herpesvirus 6 Infection in Human Dermal Fibroblasts: Possible Significance in the Induction of Fibrosis in Systemic Sclerosis
Source: MDPI journal article supplement (doi:10.3390/cells10051060), 2021-04-29
Supplement: s1 [file s1]

**Table S1. Enrichment analysis based on differentially expressed miRNAs at early times post HCMV infection (0 and 4 d.p.i.).**

| <b>Pathways</b>                                      | <b><i>p</i> val</b> | <b>adj <i>p</i> val</b> |
|------------------------------------------------------|---------------------|-------------------------|
| Gene Expression                                      | 3.04E-37            | 3.04E-35                |
| Cell Cycle, Mitotic                                  | 3.19E-20            | 1.6E-18                 |
| Infectious disease                                   | 1.36E-16            | 4.53E-15                |
| Cell Cycle                                           | 1.05E-14            | 2.63E-13                |
| Disease                                              | 3.05E-13            | 6.1E-12                 |
| HIV Infection                                        | 7.76E-13            | 1.12E-11                |
| Metabolism of proteins                               | 7.84E-13            | 1.12E-11                |
| Mitotic G1-G1/S phases                               | 8.74E-11            | 1.09E-09                |
| Mitotic Metaphase and Anaphase                       | 1.01E-10            | 1.12E-09                |
| Mitotic Anaphase                                     | 1.26E-10            | 1.26E-09                |
| M Phase                                              | 2.21E-10            | 2.01E-09                |
| Membrane Trafficking                                 | 5.09E-10            | 3.92E-09                |
| Translation                                          | 5.09E-10            | 3.92E-09                |
| HIV Life Cycle                                       | 6.67E-10            | 4.49E-09                |
| Separation of Sister Chromatids                      | 7.01E-10            | 4.49E-09                |
| S Phase                                              | 7.18E-10            | 4.49E-09                |
| Late Phase of HIV Life Cycle                         | 8.17E-10            | 4.81E-09                |
| Signalling by NGF                                    | 4E-09               | 2.22E-08                |
| Generic Transcription Pathway                        | 5.68E-09            | 2.99E-08                |
| Transcription                                        | 6.97E-09            | 3.49E-08                |
| Signaling by TGF-beta Receptor Complex               | 1.06E-08            | 5.05E-08                |
| Influenza Infection                                  | 1.45E-08            | 6.59E-08                |
| Metabolism                                           | 1.52E-08            | 6.61E-08                |
| G1/S Transition                                      | 1.82E-08            | 7.58E-08                |
| Mitotic Prometaphase                                 | 3.62E-08            | 1.38E-07                |
| DNA Replication                                      | 3.62E-08            | 1.38E-07                |
| Host Interactions of HIV factors                     | 3.72E-08            | 1.38E-07                |
| Influenza Life Cycle                                 | 4.28E-08            | 1.53E-07                |
| Cellular responses to stress                         | 6.43E-08            | 2.14E-07                |
| Signaling by the B Cell Receptor (BCR)               | 6.43E-08            | 2.14E-07                |
| Diseases of signal transduction                      | 8.55E-08            | 2.76E-07                |
| Developmental Biology                                | 9.39E-08            | 2.93E-07                |
| Influenza Viral RNA Transcription and Replication    | 1.01E-07            | 2.97E-07                |
| Beta-catenin independent WNT signaling               | 1.01E-07            | 2.97E-07                |
| Synthesis of DNA                                     | 1.13E-07            | 3.23E-07                |
| Signaling by Rho GTPases                             | 1.27E-07            | 3.53E-07                |
| Mitotic G2-G2/M phases                               | 1.55E-07            | 4.19E-07                |
| Downstream signaling events of B Cell Receptor (BCR) | 1.6E-07             | 4.21E-07                |
| Cyclin E associated events during G1/S transition    | 1.78E-07            | 4.56E-07                |
| Vesicle-mediated transport                           | 1.87E-07            | 4.68E-07                |

|                                                                           |          |          |
|---------------------------------------------------------------------------|----------|----------|
| Resolution of Sister Chromatid Cohesion                                   | 2.22E-07 | 5.39E-07 |
| SRP-dependent cotranslational protein targeting to membrane               | 2.37E-07 | 5.39E-07 |
| G2/M Transition                                                           | 2.37E-07 | 5.39E-07 |
| GTP hydrolysis and joining of the 60S ribosomal subunit                   | 2.37E-07 | 5.39E-07 |
| L13a-mediated translational silencing of Ceruloplasmin expression         | 2.93E-07 | 6.1E-07  |
| 3' -UTR-mediated translational regulation                                 | 2.93E-07 | 6.1E-07  |
| Cyclin A:Cdk2-associated events at S phase entry                          | 2.98E-07 | 6.1E-07  |
| Eukaryotic Translation Initiation                                         | 2.99E-07 | 6.1E-07  |
| Cap-dependent Translation Initiation                                      | 2.99E-07 | 6.1E-07  |
| CLEC7A (Dectin-1) signaling                                               | 3.33E-07 | 6.66E-07 |
| Cell Cycle Checkpoints                                                    | 3.55E-07 | 6.96E-07 |
| Apoptosis                                                                 | 4.77E-07 | 9.17E-07 |
| PCP/CE pathway                                                            | 8.08E-07 | 1.48E-06 |
| TRIF-mediated TLR3/TLR4 signaling                                         | 8.08E-07 | 1.48E-06 |
| DNA Repair                                                                | 8.13E-07 | 1.48E-06 |
| Signaling by EGFR                                                         | 9.37E-07 | 1.67E-06 |
| Programmed Cell Death                                                     | 9.91E-07 | 1.72E-06 |
| RNA Polymerase I, RNA Polymerase III, and Mitochondrial Transcription     | 0.000001 | 1.72E-06 |
| RHO GTPases Activate Formins                                              | 1.03E-06 | 1.75E-06 |
| VEGFA-VEGFR2 Pathway                                                      | 1.51E-06 | 2.52E-06 |
| Signaling by VEGF                                                         | 1.57E-06 | 2.57E-06 |
| Organelle biogenesis and maintenance                                      | 1.71E-06 | 2.76E-06 |
| SCF(Skp2)-mediated degradation of p27/p21                                 | 1.78E-06 | 2.83E-06 |
| NGF signalling via TRKA from the plasma membrane                          | 2.29E-06 | 3.58E-06 |
| Formation of a pool of free 40S subunits                                  | 2.38E-06 | 3.66E-06 |
| Axon guidance                                                             | 2.51E-06 | 3.8E-06  |
| Cellular response to heat stress                                          | 2.56E-06 | 3.82E-06 |
| Processing of Capped Intron-Containing Pre-mRNA                           | 3.38E-06 | 4.97E-06 |
| Hedgehog 'on' state                                                       | 0.000004 | 5.53E-06 |
| M/G1 Transition                                                           | 0.000004 | 5.53E-06 |
| DNA Replication Pre-Initiation                                            | 0.000004 | 5.53E-06 |
| Removal of licensing factors from origins                                 | 4.04E-06 | 5.53E-06 |
| Regulation of DNA replication                                             | 4.04E-06 | 5.53E-06 |
| Autodegradation of Cdh1 by Cdh1:APC/C                                     | 4.26E-06 | 5.76E-06 |
| Regulation of mRNA stability by proteins that bind AU-rich elements       | 4.38E-06 | 5.84E-06 |
| Nonsense-Mediated Decay (NMD)                                             | 4.64E-06 | 6.03E-06 |
| Nonsense Mediated Decay (NMD) enhanced by the Exon Junction Complex (EJC) | 4.64E-06 | 6.03E-06 |
| MyD88-independent TLR3/TLR4 cascade                                       | 4.98E-06 | 6.3E-06  |
| Toll Like Receptor 3 (TLR3) Cascade                                       | 4.98E-06 | 6.3E-06  |
| Signaling by Wnt                                                          | 5.45E-06 | 6.81E-06 |
| C-type lectin receptors (CLRs)                                            | 6.13E-06 | 7.57E-06 |
| Orc1 removal from chromatin                                               | 6.39E-06 | 7.7E-06  |
| Switching of origins to a post-replicative state                          | 6.39E-06 | 7.7E-06  |

|                                                                              |          |          |
|------------------------------------------------------------------------------|----------|----------|
| Activated TLR4 signalling                                                    | 6.64E-06 | 7.81E-06 |
| Nonsense Mediated Decay (NMD) independent of the Exon Junction Complex (EJC) | 6.64E-06 | 7.81E-06 |
| mRNA Splicing - Major Pathway                                                | 7.2E-06  | 8.24E-06 |
| mRNA Splicing                                                                | 7.2E-06  | 8.24E-06 |
| Fc epsilon receptor (FCERI) signaling                                        | 7.25E-06 | 8.24E-06 |
| Signaling by Interleukins                                                    | 8.29E-06 | 9.31E-06 |
| Regulation of APC/C activators between G1/S and early anaphase               | 9.59E-06 | 1.07E-05 |
| Eukaryotic Translation Elongation                                            | 9.97E-06 | 1.1E-05  |
| Activation of NF-kappaB in B cells                                           | 1.01E-05 | 1.1E-05  |
| TRAF6 Mediated Induction of proinflammatory cytokines                        | 1.11E-05 | 1.19E-05 |
| Post-translational protein modification                                      | 1.16E-05 | 1.21E-05 |
| MyD88:Mal cascade initiated on plasma membrane                               | 1.19E-05 | 1.21E-05 |
| Toll Like Receptor TLR1:TLR2 Cascade                                         | 1.19E-05 | 1.21E-05 |
| Toll Like Receptor TLR6:TLR2 Cascade                                         | 1.19E-05 | 1.21E-05 |
| Toll Like Receptor 2 (TLR2) Cascade                                          | 1.19E-05 | 1.21E-05 |
| Regulation of PLK1 Activity at G2/M Transition                               | 1.54E-05 | 1.56E-05 |
| Assembly of the pre-replicative complex                                      | 1.58E-05 | 1.58E-05 |
