# Supplementary material for: Modulation of microRNome by Human Cytomegalovirus and Human Herpesvirus 6 Infection in Human Dermal Fibroblasts: Possible Significance in the Induction of Fibrosis in Systemic Sclerosis
Source: MDPI journal article supplement (doi:10.3390/cells10051060), 2021-04-29
Supplement: s1 [file s1]

**Table S3. Enrichment analysis based on differentially expressed miRNAs at late times post HCMV infection (10 and 14 d.p.i.)**

| Pathways                                                                        | <i>p</i> val | adj <i>p</i> val |
|---------------------------------------------------------------------------------|--------------|------------------|
| Homologous Recombination Repair                                                 | 0            | 0                |
| Double-Strand Break Repair                                                      | 0            | 0                |
| Homologous recombination repair of replication-independent double-strand breaks | 0            | 0                |
| Recruitment of repair and signaling proteins to double-strand breaks            | 0            | 0                |
| Gene Expression                                                                 | 6.44E-41     | 1.29E-39         |
| Cell Cycle                                                                      | 5.35E-25     | 8.92E-24         |
| Cell Cycle, Mitotic                                                             | 4.42E-24     | 6.31E-23         |
| Cellular responses to stress                                                    | 1.77E-19     | 2.21E-18         |
| Metabolism of proteins                                                          | 1.42E-14     | 1.58E-13         |
| Cellular Senescence                                                             | 2.34E-14     | 2.23E-13         |
| Disease                                                                         | 2.45E-14     | 2.23E-13         |
| Metabolism                                                                      | 3.24E-13     | 2.7E-12          |
| M Phase                                                                         | 6.66E-13     | 5.12E-12         |
| Infectious disease                                                              | 6.03E-11     | 4.31E-10         |
| Generic Transcription Pathway                                                   | 9.03E-11     | 6.02E-10         |
| RHO GTPase Effectors                                                            | 5.03E-10     | 3.14E-09         |
| Epigenetic regulation of gene expression                                        | 1.19E-09     | 7E-09            |
| Signaling by Rho GTPases                                                        | 2.57E-09     | 1.43E-08         |
| Post-translational protein modification                                         | 3.79E-09     | 1.99E-08         |
| Oxidative Stress Induced Senescence                                             | 4.47E-09     | 2.24E-08         |
| Signaling by Wnt                                                                | 4.85E-09     | 2.31E-08         |
| Mitotic G1-G1/S phases                                                          | 5.54E-09     | 2.52E-08         |
| HIV Infection                                                                   | 7.07E-09     | 3.07E-08         |
| Mitotic G2-G2/M phases                                                          | 1.12E-08     | 4.67E-08         |
| G2/M Transition                                                                 | 1.69E-08     | 6.65E-08         |
| DNA Repair                                                                      | 1.73E-08     | 6.65E-08         |
| S Phase                                                                         | 3.26E-08     | 1.21E-07         |
| Translation                                                                     | 4.09E-08     | 1.46E-07         |
| TCF dependent signaling in response to WNT                                      | 4.27E-08     | 1.47E-07         |
| Negative epigenetic regulation of rRNA expression                               | 5.02E-08     | 1.67E-07         |
| Mitotic Metaphase and Anaphase                                                  | 6.19E-08     | 2E-07            |
| Mitotic Anaphase                                                                | 7.35E-08     | 2.3E-07          |
| Cell Cycle Checkpoints                                                          | 7.71E-08     | 2.34E-07         |
| NoRC negatively regulates rRNA expression                                       | 9.7E-08      | 2.85E-07         |
| Chromatin modifying enzymes                                                     | 1.25E-07     | 3.47E-07         |
| Chromatin organization                                                          | 1.25E-07     | 3.47E-07         |
| Signaling by TGF-beta Receptor Complex                                          | 1.5E-07      | 3.95E-07         |
| Senescence-Associated Secretory Phenotype (SASP)                                | 1.5E-07      | 3.95E-07         |
| Asparagine N-linked glycosylation                                               | 2.38E-07     | 6.1E-07          |
| HIV Life Cycle                                                                  | 2.45E-07     | 6.13E-07         |
| Separation of Sister Chromatids                                                 | 2.88E-07     | 7.02E-07         |

|                                                                           |          |          |
|---------------------------------------------------------------------------|----------|----------|
| Organelle biogenesis and maintenance                                      | 3.92E-07 | 9.33E-07 |
| G1/S Transition                                                           | 4.92E-07 | 1.14E-06 |
| Influenza Infection                                                       | 5.65E-07 | 1.28E-06 |
| SUMOylation                                                               | 6.6E-07  | 1.47E-06 |
| DNA Replication                                                           | 8.73E-07 | 1.9E-06  |
| Mitotic Prophase                                                          | 0.000001 | 2.13E-06 |
| Respiratory electron transport                                            | 1.23E-06 | 2.56E-06 |
| Influenza Life Cycle                                                      | 1.39E-06 | 2.84E-06 |
| Late Phase of HIV Life Cycle                                              | 1.42E-06 | 2.84E-06 |
| Apoptosis                                                                 | 1.65E-06 | 3.13E-06 |
| Eukaryotic Translation Initiation                                         | 1.66E-06 | 3.13E-06 |
| Cap-dependent Translation Initiation                                      | 1.66E-06 | 3.13E-06 |
| SUMOylation of DNA damage response and repair proteins                    | 1.86E-06 | 3.38E-06 |
| SUMO E3 ligases SUMOylate target proteins                                 | 1.86E-06 | 3.38E-06 |
| RHO GTPases activate PKNs                                                 | 2.09E-06 | 3.73E-06 |
| Synthesis of DNA                                                          | 2.26E-06 | 3.95E-06 |
| Transcriptional regulation by small RNAs                                  | 2.29E-06 | 3.95E-06 |
| Cellular response to heat stress                                          | 2.81E-06 | 4.7E-06  |
| Influenza Viral RNA Transcription and Replication                         | 2.82E-06 | 4.7E-06  |
| Membrane Trafficking                                                      | 3.68E-06 | 6.03E-06 |
| Programmed Cell Death                                                     | 3.77E-06 | 6.08E-06 |
| Axon guidance                                                             | 4.4E-06  | 6.98E-06 |
| Regulation of PLK1 Activity at G2/M Transition                            | 4.51E-06 | 7.05E-06 |
| Diseases of signal transduction                                           | 4.99E-06 | 7.68E-06 |
| GTP hydrolysis and joining of the 60S ribosomal subunit                   | 5.7E-06  | 8.64E-06 |
| L13a-mediated translational silencing of Ceruloplasmin expression         | 6.8E-06  | 0.00001  |
| 3' -UTR-mediated translational regulation                                 | 6.8E-06  | 0.00001  |
| Transcription                                                             | 6.94E-06 | 1.01E-05 |
| TRIF-mediated TLR3/TLR4 signaling                                         | 9.85E-06 | 1.41E-05 |
| Assembly of the primary cilium                                            | 1.05E-05 | 1.48E-05 |
| Developmental Biology                                                     | 1.45E-05 | 2.01E-05 |
| G2/M Checkpoints                                                          | 0.000015 | 2.05E-05 |
| MyD88:Mal cascade initiated on plasma membrane                            | 1.76E-05 | 2.29E-05 |
| Toll Like Receptor TLR1:TLR2 Cascade                                      | 1.76E-05 | 2.29E-05 |
| Toll Like Receptor TLR6:TLR2 Cascade                                      | 1.76E-05 | 2.29E-05 |
| Toll Like Receptor 2 (TLR2) Cascade                                       | 1.76E-05 | 2.29E-05 |
| Activated TLR4 signalling                                                 | 1.92E-05 | 2.46E-05 |
| Processing of Capped Intron-Containing Pre-mRNA                           | 1.97E-05 | 2.49E-05 |
| Nonsense-Mediated Decay (NMD)                                             | 2.16E-05 | 2.67E-05 |
| Nonsense Mediated Decay (NMD) enhanced by the Exon Junction Complex (EJC) | 2.16E-05 | 2.67E-05 |
| Host Interactions of HIV factors                                          | 0.000024 | 2.93E-05 |
| SRP-dependent cotranslational protein targeting to membrane               | 2.55E-05 | 3.07E-05 |
| Cyclin E associated events during G1/S transition                         | 2.68E-05 | 3.15E-05 |

|                                                          |          |          |
|----------------------------------------------------------|----------|----------|
| Regulatory RNA pathways                                  | 2.71E-05 | 3.15E-05 |
| Mitotic Prometaphase                                     | 2.71E-05 | 3.15E-05 |
| Recruitment of mitotic centrosome proteins and complexes | 3.15E-05 | 3.58E-05 |
| Centrosome maturation                                    | 3.15E-05 | 3.58E-05 |
| CLEC7A (Dectin-1) signaling                              | 3.22E-05 | 3.62E-05 |
| Autodegradation of Cdh1 by Cdh1:APC/C                    | 3.28E-05 | 3.64E-05 |
| Vesicle-mediated transport                               | 3.63E-05 | 3.96E-05 |
| APC/C-mediated degradation of cell cycle proteins        | 3.71E-05 | 3.96E-05 |
| Regulation of mitotic cell cycle                         | 3.71E-05 | 3.96E-05 |
| mRNA Splicing - Major Pathway                            | 3.76E-05 | 3.96E-05 |
| mRNA Splicing                                            | 3.76E-05 | 3.96E-05 |
| Formation of a pool of free 40S subunits                 | 3.81E-05 | 3.97E-05 |
| Anchoring of the basal body to the plasma membrane       | 0.000039 | 4.02E-05 |
| Cyclin A:Cdk2-associated events at S phase entry         | 4.02E-05 | 4.1E-05  |
| Signalling by NGF                                        | 4.06E-05 | 4.1E-05  |
| M/G1 Transition                                          | 4.45E-05 | 4.45E-05 |
