# Supplementary material for: Modulation of microRNome by Human Cytomegalovirus and Human Herpesvirus 6 Infection in Human Dermal Fibroblasts: Possible Significance in the Induction of Fibrosis in Systemic Sclerosis
Source: MDPI journal article supplement (doi:10.3390/cells10051060), 2021-04-29
Supplement: s1 [file s1]

**Table S6. Enrichment analysis based on differentially expressed miRNAs at late times post HHV-6 infection (10 and 14 d.p.i.)**

| Pathways                                             | <i>p</i> val | adj <i>p</i> val |
|------------------------------------------------------|--------------|------------------|
| Gene Expression                                      | 4E-20        | 4E-18            |
| Metabolism of proteins                               | 2.18E-13     | 1.09E-11         |
| Cell Cycle, Mitotic                                  | 4.01E-11     | 1.34E-09         |
| Signalling by NGF                                    | 1.36E-10     | 2.74E-09         |
| Infectious disease                                   | 1.82E-10     | 2.74E-09         |
| HIV Infection                                        | 1.85E-10     | 2.74E-09         |
| Membrane Trafficking                                 | 1.92E-10     | 2.74E-09         |
| Disease                                              | 2.73E-10     | 3.41E-09         |
| HIV Life Cycle                                       | 1.36E-09     | 1.44E-08         |
| Cell Cycle                                           | 1.44E-09     | 1.44E-08         |
| Post-translational protein modification              | 3.21E-09     | 2.92E-08         |
| DNA Repair                                           | 4.42E-09     | 3.68E-08         |
| Generic Transcription Pathway                        | 5.45E-09     | 4.19E-08         |
| Late Phase of HIV Life Cycle                         | 9.48E-09     | 6.77E-08         |
| Diseases of signal transduction                      | 1.42E-08     | 9.47E-08         |
| NGF signalling via TRKA from the plasma membrane     | 2.45E-08     | 1.53E-07         |
| Signaling by EGFR                                    | 4.07E-08     | 2.39E-07         |
| Signaling by the B Cell Receptor (BCR)               | 8.5E-08      | 4.72E-07         |
| Mitotic G2-G2/M phases                               | 1.67E-07     | 8.79E-07         |
| Vesicle-mediated transport                           | 2.2E-07      | 1.1E-06          |
| G2/M Transition                                      | 2.43E-07     | 1.16E-06         |
| Immune System                                        | 3.61E-07     | 1.64E-06         |
| Asparagine N-linked glycosylation                    | 3.81E-07     | 1.66E-06         |
| Mitotic G1-G1/S phases                               | 4.46E-07     | 1.86E-06         |
| Signaling by ERBB2                                   | 5.87E-07     | 2.35E-06         |
| Signaling by PDGF                                    | 6.54E-07     | 2.45E-06         |
| Developmental Biology                                | 6.62E-07     | 2.45E-06         |
| Downstream signaling events of B Cell Receptor (BCR) | 1.34E-06     | 4.79E-06         |
| Metabolism                                           | 1.72E-06     | 5.93E-06         |
| S Phase                                              | 2.16E-06     | 7.2E-06          |
| Downstream signal transduction                       | 2.75E-06     | 7.64E-06         |
| Signaling by FGFR                                    | 2.75E-06     | 7.64E-06         |
| Signaling by FGFR1                                   | 2.75E-06     | 7.64E-06         |
| Signaling by FGFR2                                   | 2.75E-06     | 7.64E-06         |
| Signaling by FGFR3                                   | 2.75E-06     | 7.64E-06         |
| Signaling by FGFR4                                   | 2.75E-06     | 7.64E-06         |
| Transcription                                        | 3.39E-06     | 9.16E-06         |
| EPH-Ephrin signaling                                 | 3.58E-06     | 9.42E-06         |
| Signaling by TGF-beta Receptor Complex               | 3.88E-06     | 9.95E-06         |
| Organelle biogenesis and maintenance                 | 5.02E-06     | 1.26E-05         |
| VEGFA-VEGFR2 Pathway                                 | 5.78E-06     | 1.41E-05         |

|                                                                                                                       |          |          |
|-----------------------------------------------------------------------------------------------------------------------|----------|----------|
| Translation                                                                                                           | 0.000006 | 1.41E-05 |
| DAP12 signaling                                                                                                       | 6.24E-06 | 1.41E-05 |
| Programmed Cell Death                                                                                                 | 6.24E-06 | 1.41E-05 |
| Regulation of PLK1 Activity at G2/M Transition                                                                        | 6.36E-06 | 1.41E-05 |
| Processing of Capped Intron-Containing Pre-mRNA                                                                       | 7.29E-06 | 1.56E-05 |
| Fc epsilon receptor (FCERI) signaling                                                                                 | 7.33E-06 | 1.56E-05 |
| Signaling by VEGF                                                                                                     | 8.04E-06 | 1.68E-05 |
| Axon guidance                                                                                                         | 9.05E-06 | 1.85E-05 |
| Apoptosis                                                                                                             | 9.81E-06 | 1.96E-05 |
| Adaptive Immune System                                                                                                | 1.16E-05 | 2.27E-05 |
| Signaling by SCF-KIT                                                                                                  | 1.23E-05 | 2.37E-05 |
| mRNA Splicing - Major Pathway                                                                                         | 1.41E-05 | 2.61E-05 |
| mRNA Splicing                                                                                                         | 1.41E-05 | 2.61E-05 |
| Biosynthesis of the N-glycan precursor (dolichol lipid-linked oligosaccharide, LLO) and transfer to a nascent protein | 1.58E-05 | 2.87E-05 |
| Signaling by NOTCH                                                                                                    | 1.73E-05 | 2.92E-05 |
| Downstream signaling of activated FGFR1                                                                               | 1.75E-05 | 2.92E-05 |
| Downstream signaling of activated FGFR2                                                                               | 1.75E-05 | 2.92E-05 |
| Downstream signaling of activated FGFR3                                                                               | 1.75E-05 | 2.92E-05 |
| Downstream signaling of activated FGFR4                                                                               | 1.75E-05 | 2.92E-05 |
| Nucleotide Excision Repair                                                                                            | 1.91E-05 | 3.13E-05 |
| G1/S Transition                                                                                                       | 2.36E-05 | 3.64E-05 |
| MyD88:Mal cascade initiated on plasma membrane                                                                        | 0.000024 | 3.64E-05 |
| Toll Like Receptor TLR1:TLR2 Cascade                                                                                  | 0.000024 | 3.64E-05 |
| Toll Like Receptor TLR6:TLR2 Cascade                                                                                  | 0.000024 | 3.64E-05 |
| Toll Like Receptor 2 (TLR2) Cascade                                                                                   | 0.000024 | 3.64E-05 |
| Platelet activation, signaling and aggregation                                                                        | 3.15E-05 | 4.7E-05  |
| Cellular response to heat stress                                                                                      | 0.000035 | 5.15E-05 |
| DNA Replication                                                                                                       | 0.000039 | 5.65E-05 |
| PI3K/AKT Signaling in Cancer                                                                                          | 4.25E-05 | 6.07E-05 |
| RNA Polymerase II Transcription                                                                                       | 0.000044 | 6.2E-05  |
| Assembly of the primary cilium                                                                                        | 5.07E-05 | 7.04E-05 |
| GAB1 signalosome                                                                                                      | 5.44E-05 | 7.45E-05 |
| Transcription-coupled NER (TC-NER)                                                                                    | 5.58E-05 | 7.54E-05 |
| SUMOylation                                                                                                           | 6.07E-05 | 8.09E-05 |
| PI3K/AKT activation                                                                                                   | 6.41E-05 | 8.43E-05 |
| HIV Transcription Initiation                                                                                          | 6.91E-05 | 8.43E-05 |
| RNA Polymerase II HIV Promoter Escape                                                                                 | 6.91E-05 | 8.43E-05 |
| RNA Polymerase II Promoter Escape                                                                                     | 6.91E-05 | 8.43E-05 |
| RNA Polymerase II Transcription Pre-Initiation And Promoter Opening                                                   | 6.91E-05 | 8.43E-05 |
| RNA Polymerase II Transcription Initiation                                                                            | 6.91E-05 | 8.43E-05 |
| RNA Polymerase II Transcription Initiation And Promoter Clearance                                                     | 6.91E-05 | 8.43E-05 |
| Beta-catenin independent WNT signaling                                                                                | 7.55E-05 | 9.1E-05  |
| TRIF-mediated TLR3/TLR4 signaling                                                                                     | 8.66E-05 | 0.000103 |

|                                                            |          |          |
|------------------------------------------------------------|----------|----------|
| Synthesis of DNA                                           | 0.000089 | 0.000105 |
| TRAF6 Mediated Induction of proinflammatory cytokines      | 9.44E-05 | 0.00011  |
| Signaling by ERBB4                                         | 9.76E-05 | 0.000111 |
| PI3K events in ERBB4 signaling                             | 0.000105 | 0.000111 |
| PIP3 activates AKT signaling                               | 0.000105 | 0.000111 |
| PI3K events in ERBB2 signaling                             | 0.000105 | 0.000111 |
| PI-3K cascade:FGFR                                         | 0.000105 | 0.000111 |
| Transcriptional activity of SMAD2/SMAD3:SMAD4 heterotrimer | 0.000106 | 0.000111 |
| Transcription of the HIV genome                            | 0.000107 | 0.000111 |
| Activated TLR4 signalling                                  | 0.000123 | 0.000127 |
| SUMOylation of DNA damage response and repair proteins     | 0.000147 | 0.000148 |
| SUMO E3 ligases SUMOylate target proteins                  | 0.000147 | 0.000148 |
| Mitotic Metaphase and Anaphase                             | 0.000155 | 0.000155 |
